# Supplementary material
Source: HighWire-hosted journal article supplement (https://erj.ersjournals.com/content/54/5/1900881)
Supplement: inline-supplementary-material-1 [file inline-supplementary-material-1.pdf]

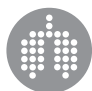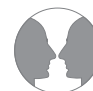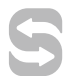

SHAREABLE PDF

# Noninvasive *versus* invasive pressure–flow relationship of the pulmonary circulation: bias and error

Sergio Caravita <sup>1,2,3,5</sup>, Patrick Yerly<sup>4,5</sup>, Claudia Baratto<sup>1,2</sup>, Céline Dewachter<sup>3</sup>, Andrea Faini <sup>1</sup>, Asma Rimouche<sup>3</sup>, Giovanna Branzi<sup>1</sup>, Giovanni Battista Perego <sup>1</sup>, Antoine Bondue<sup>3</sup>, Gianfranco Parati<sup>1,2</sup> and Jean-Luc Vachiéry<sup>3</sup>

**Affiliations:** <sup>1</sup>Istituto Auxologico Italiano, IRCCS, Ospedale San Luca, Milan, Italy. <sup>2</sup>Dept of Medicine and Surgery, University of Milano-Bicocca, Milan, Italy. <sup>3</sup>Dept of Cardiology, Cliniques Universitaires de Bruxelles, Hôpital Académique Erasme, Brussels, Belgium. <sup>4</sup>Dept of Cardiology, Centre Hospitalier Universitaire Vaudois, Lausanne, Switzerland. <sup>5</sup>Both authors contributed equally.

**Correspondence:** Jean-Luc Vachiéry, Dept of Cardiology, CUB Hôpital Erasme, 808 Route de Lennik, 1070 Brussels, Belgium. E-mail: [jeanluc.vachiery@erasme.ulb.ac.be](mailto:jeanluc.vachiery@erasme.ulb.ac.be)

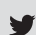

@ERSpublications

Exercise echocardiography can provide imprecise but rather accurate and sensitive estimates of pressure–flow relationships of the pulmonary circulation, as compared with RHC under exercise <http://bit.ly/2YQIPZ1>

**Cite this article as:** Caravita S, Yerly P, Baratto C, *et al.* Noninvasive *versus* invasive pressure–flow relationship of the pulmonary circulation: bias and error. *Eur Respir J* 2019; 54: 1900881 [<https://doi.org/10.1183/13993003.00881-2019>].

This single-page version can be shared freely online.

## To the Editor:

Testing the pulmonary circulation in dynamic conditions has been proposed in recent years as a means to provide additional insights into patients' symptoms and disease severity, complementing diagnostic evaluations at rest [1–6]. As pulmonary vascular haemodynamics can be described as a function of flow, resistance and left atrial pressure, it has been suggested that pressure–flow relationship of the pulmonary circulation can discriminate normal from abnormal behaviours, the latter consistent with cardiac, pulmonary or pulmonary vascular disease [4].
